# Supplementary material
Source: PubMed Central journal article supplement (PMC7196423)
Supplement: mmc1.pdf [file mmc1.pdf]

## **QUESTIONNAIRE** about the assessment of SARS-COV2 epidemic impact on the Maxillofacial Surgery activity in Italy

All the provided information is confidential. In the manuscript, only the geographic areas will be differentiated in order to distinguish the most involved areas (Piedmont, Lombardy, Veneto, Emilia Romagna) from the rest of Italy

---

### Section I - General Information

1. In which Hospital do you work? (optional) \_\_\_\_\_
2. In which town do you work?  
\_\_\_\_\_
3. In which region do you work?  
\_\_\_\_\_

---

### Section II - Workload

4. How many doctors worked in your team before SARS-COV2 epidemic developed in Italy?  
Number of staff physicians: \_\_\_\_\_  
Number of extra-staff freelance physicians: \_\_\_\_\_  
Number of Residents: \_\_\_\_\_
5. How many doctors work in your team since SARS-COV2 epidemic developed in Italy?  
Number of staff physicians: \_\_\_\_\_  
Number of extra-staff freelance physicians: \_\_\_\_\_  
Number of Residents: \_\_\_\_\_
6. How many doctors of your team have been redirected to different activities in other wards?  
\_\_\_\_\_
7. If yes, in which wards? (Multiple choices are possible)
  - "COVID" Internal Medicine Unit
  - "Non COVID" Internal Medicine Unit
  - Infectious Disease Unit
  - Respiratory Disease Unit
  - ER
  - Intensive Care Unit
  - Service Medicine (Occupational Medicine, emergency hotline)
  - Other: \_\_\_\_\_
8. Speaking about outpatient visits, how many patients did your team evaluate per week, before SARS-COV2 epidemic developed in Italy? \_\_\_\_\_
9. Speaking about outpatient visits, how many patients does your team evaluate per week, since SARS-COV2 epidemic developed in Italy? \_\_\_\_\_

10. Speaking about outpatient surgery (i.e. day surgery), how many patients per week underwent minor surgery in your department before SARS-COV2 epidemic developed in Italy? \_\_\_\_\_
11. Speaking about outpatient surgery (i.e. day surgery), how many patients per week undergo minor surgery in your department since SARS-COV2 epidemic developed in Italy? \_\_\_\_\_
12. Which kind of outpatient surgery (i.e. day surgery) did you and your team perform before SARS-COV2 epidemic developed in Italy? (Multiple choices are possible)
- Oral surgery
  - Implantology and Pre-implant reconstructive surgery
  - Dermatologic surgery
  - Biopsy
  - Other: \_\_\_\_\_
13. Which kind of outpatient surgery (i.e. day surgery) do you and your team perform since SARS-COV2 epidemic developed in Italy? (Multiple choices are possible)
- Oral surgery
  - Implantology and Pre-implant reconstructive surgery
  - Dermatologic surgery
  - Biopsy
  - Other: \_\_\_\_\_
14. Your department now:
- Is open with the same number of beds
  - Is open with a reduced number of beds
  - Is merged with some other surgical wards
  - Has become "COVID" unit
15. Speaking about surgical interventions, how many patients underwent surgery under general anaesthesia per week in your department before SARS-COV2 epidemic developed in Italy? \_\_\_\_\_
16. Speaking about surgical interventions, how many patients undergo surgery under general anaesthesia per week in your department since SARS-COV2 epidemic developed in Italy? \_\_\_\_\_
17. Speaking about surgical intervention, what kind of surgery did you and your team mostly perform before SARS-COV2 epidemic developed in Italy? (Multiple choices are possible)
- Traumas
  - Orthognathic surgery
  - Temporomandibular joint surgery
  - Head and neck oncology
  - Microsurgery
  - Craniofacial surgery
  - Paediatric surgery
  - Implantology and Pre-implant reconstructive surgery
  - Oral surgery
  - Other: \_\_\_\_\_

18. Speaking about surgical intervention, what kind of surgery do you and your team mostly perform since SARS-COV2 epidemic developed in Italy? (Multiple choices are possible)

- Traumas
- Orthognathic surgery
- Temporomandibular joint surgery
- Head and neck oncology
- Microsurgery
- Craniofacial surgery
- Paediatric surgery
- Implantology and Pre-implant reconstructive surgery
- Oral surgery
- Other: \_\_\_\_\_

19. Was some COVID-free surgical Hub identified in your region in order to guarantee the management of specific surgery since SARS-COV2 epidemic developed in Italy?

- Yes
- No

20. If yes, for which kind of surgical procedures? (Multiple choices are possible)

- Traumas
  - Major traumas
  - COVID traumas
  - "COVID-free" traumas
- Oncology
  - Major oncology with eventual post-operative intensive care monitoring
  - "COVID-free" oncology
- Surgery for paediatric malformation
- Other: \_\_\_\_\_

21. Was your hospital/department designated as a COVID-free surgical Hub? If yes, for which kind of surgical procedures? (Multiple choices are possible)

- Traumas
  - Major traumas
  - COVID traumas
  - "COVID-free" traumas
- Oncology
  - Major oncology with eventual post-operative intensive care monitoring
  - "COVID-free" oncology
- Surgery for paediatric malformation
- Other: \_\_\_\_\_

22. Was the private practice maintained inside the hospital since SARS-COV2 epidemic developed in Italy? (Multiple choices are possible)

- Yes - outpatient visits
  - Yes - outpatient surgery
  - Yes - general anaesthesia surgery
  - no
-

---

---

### Section III: Screening procedures on the population

23. Were some samples obtained in your department in order to screen or diagnose SARS-COV2 infection? (Multiple choices are possible)

- Yes, since the day: \_\_\_\_\_
- Yes, for every hospitalized patient
- Yes, for every patient that undergoes surgery
- Yes, for every patient with some comorbidity
- Yes, for every patient complained about suspect symptoms
- No

24. Were there in your department SARS-COV2-positive patients?

- Yes
- No
- No patient has been tested for SARS-COV2 infection

25. If yes, positive patients:

- Have been isolated in the same ward
- Transferred in a COVID ward
- Other: \_\_\_\_\_

26. Did some doctors of your team become SARS-COV2 positive?

- Yes (N° \_\_\_\_\_)
- No
- I don't know

27. If yes, the SARS-COV2 positive colleagues:

- Are standard-quarantined at home, waiting for undergoing the nasopharyngeal swab in order to come back work
- Are prolonged-quarantined at home because of the persistent positive nasopharyngeal swab / persistent symptomatology
- Came back work after the nasopharyngeal swab became negative (say how many days they stayed home before coming back work: \_\_\_\_\_)

---

---

### Section IV - Personal Protective Equipment (PPE)

28. Which kind of PPE did the Hospital provide to your équipe? (Multiple choices are possible)

- FFP1 masks
- FFP2 masks
- FFP3 masks
- Single-use gloves
- Single-use suit
- Protective glasses / protective visor

- EN 14683-conformed surgical mask (medical devices, they are not PPE)
- None of the above
- Other: \_\_\_\_\_

29. Are those PPE enough for your activities?

- Yes
- Partially (i.e. they are often reused)
- No

30. Did your hospital provide guidelines/protocols about outpatient visits and surgical procedures during the SARS-COV2 epidemic in Italy?

- Yes, immediately
- Yes, gradually with the development of the epidemic
- No

31. Which kind of precautions have been adopted by your hospital in order to limit the spread of the infection during the outpatient visits? (Multiple choices are possible)

- All the healthcare workers wear adequate PPEs
- All patients received PPEs from the hospital
- Hospital furniture have been moved in order to guarantee the safety distance
- Waiting rooms have been reorganized in order to avoid crowd
- Telephonic consultation before going to the clinic
- Body temperature assessment before coming inside the hospital for all patients
- Questionnaire to find out risk factors (contact with SARS-COV2 positive people, travel)
- Removal of unnecessary physical contacts (i.e. handshake)
- Other: \_\_\_\_\_

32. Which kind of precautions have been adopted by your hospital in order to limit the spread of the infection during hospital admissions? (Multiple choices are possible)

- Body temperature assessment before coming inside the hospital for all healthcare workers
- All the healthcare workers wear adequate PPEs
- All patients received PPEs from the hospital
- Limited access to the hospital/department for relatives and friends
- Telephonic consultation before going to the clinic
- Body temperature assessment before coming inside the hospital for all patients
- Questionnaire to find out risk factors (contact with SARS-COV2 positive people, travel)
- Screening tests to find out SARS-COV2 infections
- Removal of unnecessary physical contacts (i.e. handshake)
- Other: \_\_\_\_\_
